# Supplementary material
Source: Springer Nature journal article supplement (https://www.springermedizin.de/resource/supplementary/13054_2010_8526_MOESM5_ESM.pdf/9732162)

**A****NOS activity  
in lung tissue****(pmol/mg protein)**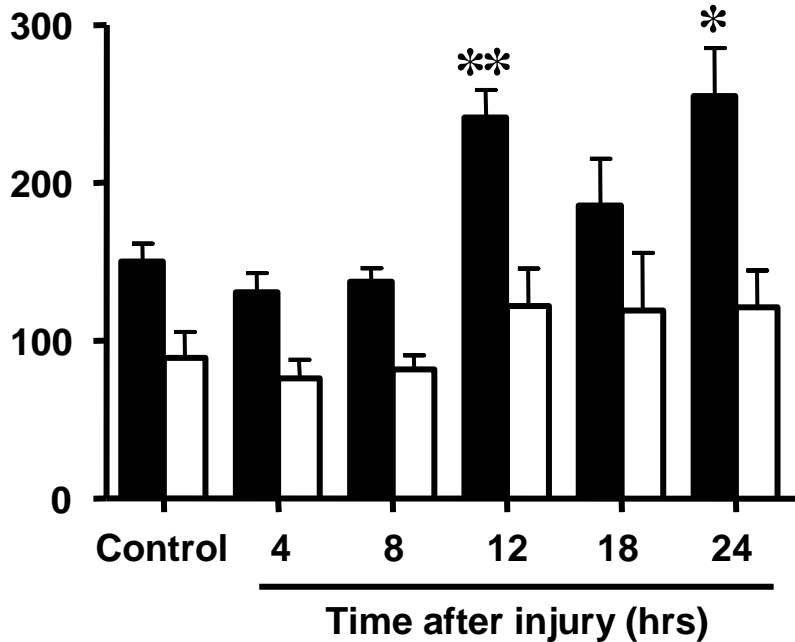**B****Plasma NOx****( $\mu$ mol/L)**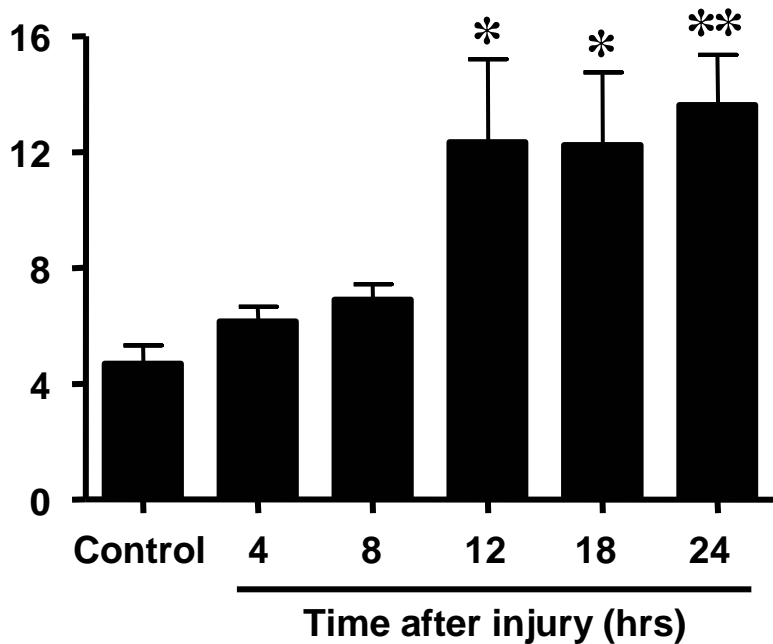

Supplement: MOESM5 [file 9732162]
